# Supplementary material for: Extreme Ice Crystal Events Linked to Biomass and Fossil Fuel Combustion
Source: Copernicus journal article supplement (doi:10.5194/acp-2021-288), 2021-05-12
Supplement: Supplementary file 1 [file acp-2021-288-supplement.pdf]

## Supplementary Material

Graciela B Raga<sup>1</sup>, Darrel Baumgardner<sup>2</sup>, Blanca Rios<sup>1</sup>, Yanet Díaz-Esteban<sup>1</sup>, Alejandro Jaramillo<sup>1</sup>, Martin Gallagher<sup>3</sup>, Bastien Sauvage<sup>5</sup>, Pawel Wolff<sup>5</sup> and Gary Lloyd<sup>3,4</sup>

<sup>1</sup>Centro de Ciencias de la Atmósfera, Universidad Nacional Autónoma de México, Mexico City, Mexico

<sup>2</sup>Droplet Measurement Technologies, LLC, Longmont, CO, USA

<sup>3</sup>Centre for Atmospheric Science, University of Manchester, Manchester M13 9PL, UK

<sup>4</sup>National Centre for Atmospheric Science (NCAS), University of Manchester, Manchester M13 9PL, UK

<sup>5</sup>Laboratoire d'aérodologie (LA), CNRS UMR-5560 et Observatoire Midi-Pyrénées, Université de Toulouse, France

Correspondence to: Darrel Baumgardner (Darrel.baumgardner@gmail.com)

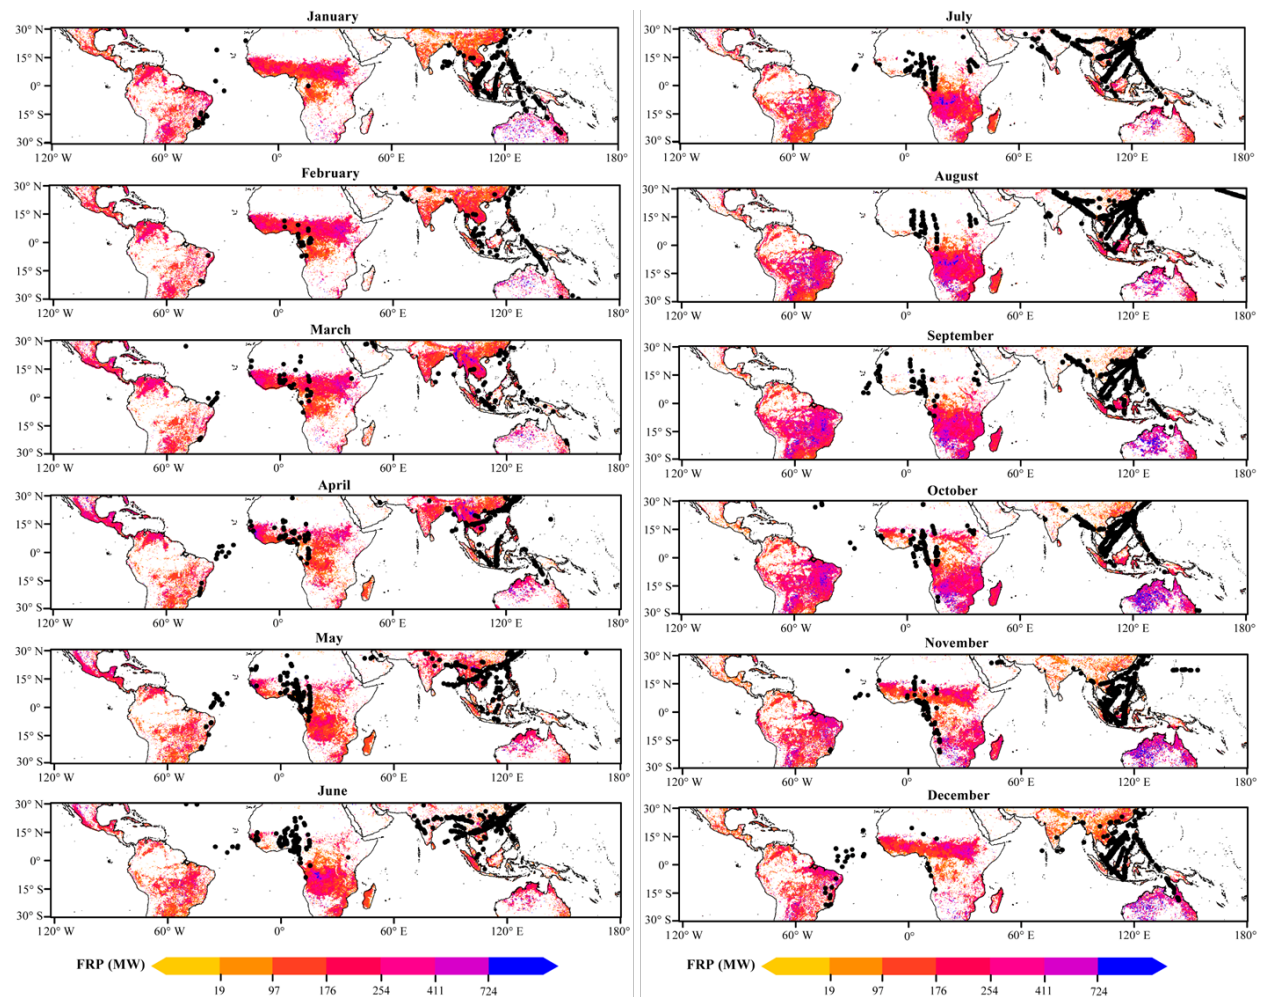

Figure SM1. Comparison of the fire radiative power derived from MODIS on the a) Aqua (nadir pass at 1:30pm LT) and b) Terra (nadir pass at 10:30amLT) satellites for July through December (2011-2019). The orange markers show the location of Extreme Ice Events (EIE) in cirrus observed in each month. (Logarithmic scale?)

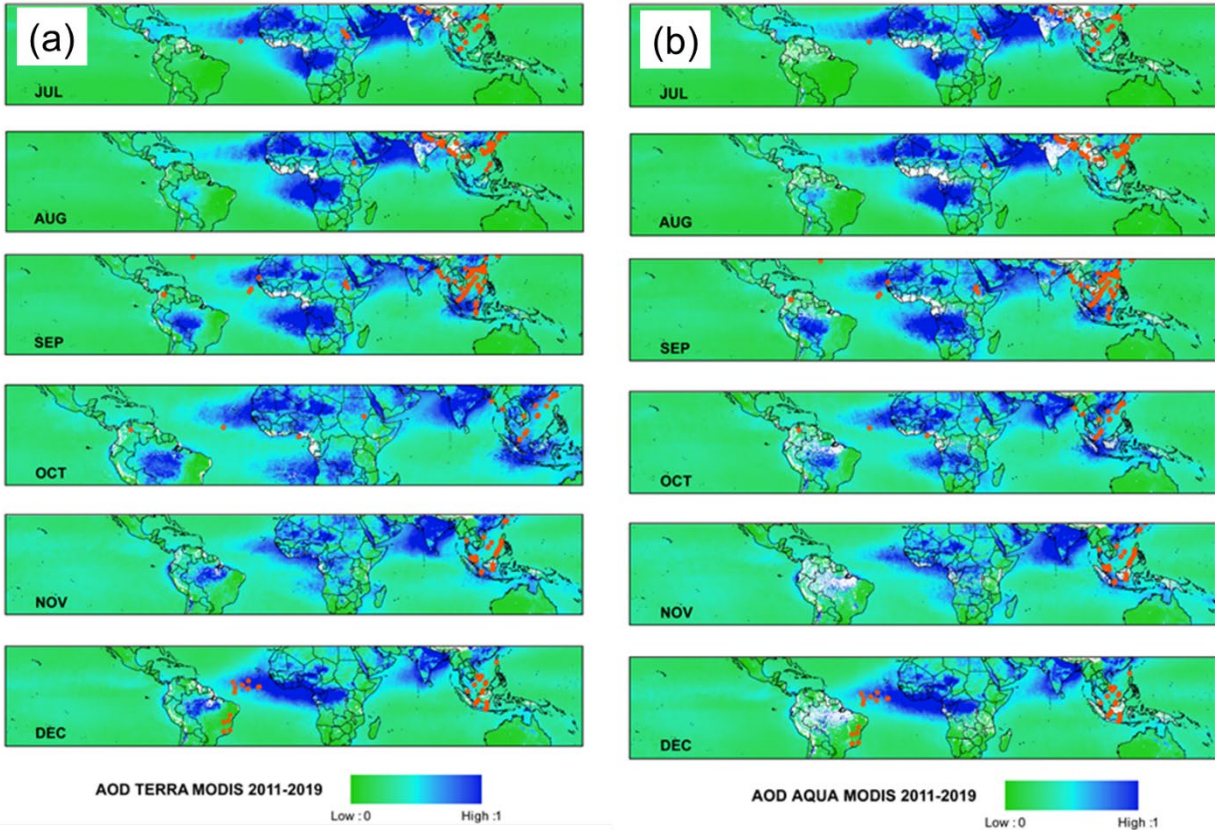

Figure SM2. Comparison of the aerosol optical depth (AOD) derived from the a) Terra (nadir pass at 10:30am LT) and b) Aqua (nadir pass at 1:30pm LT) and MODIS satellite images. The AOD plotted is a nondimensional value normalized here to fall between 0 (lowest) to 1 (highest). The orange markers show the location of Extreme Ice Events (EIE) in cirrus observed in each month. White regions correspond to the widespread presence of clouds that render impossible the determination of AOD.

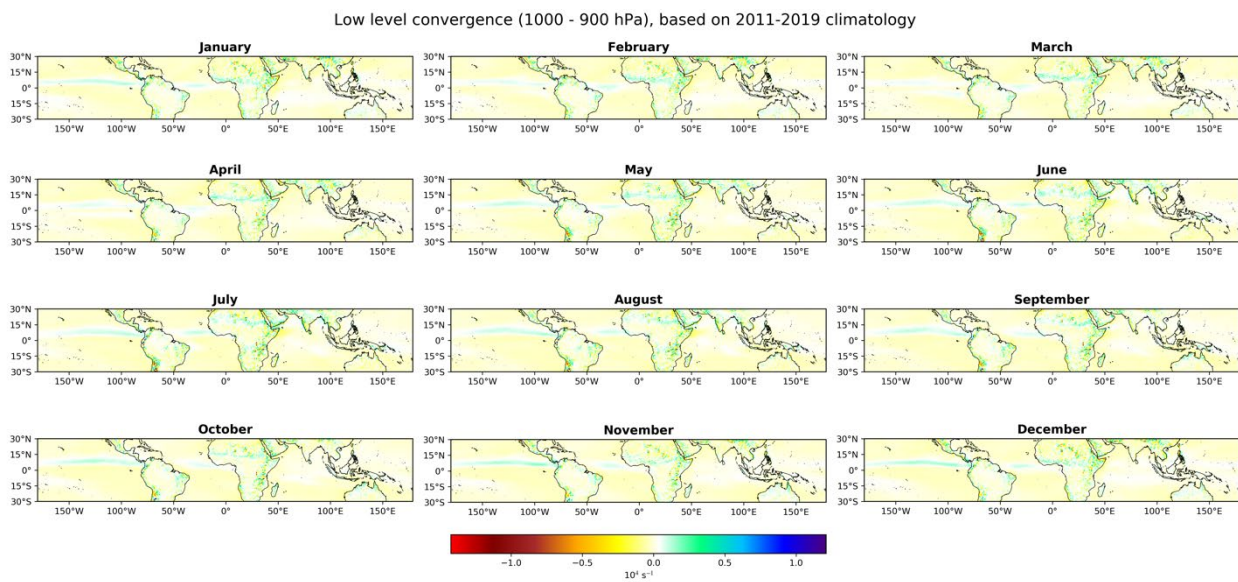



Figure SM3. Spatial distribution of the horizontal wind divergence at 850 hPa, determined from ERA5 reanalysis (2011-2019). The dark dots show the location of cirrus with Extreme Ice Events (EIE) in cirrus observed in each month.

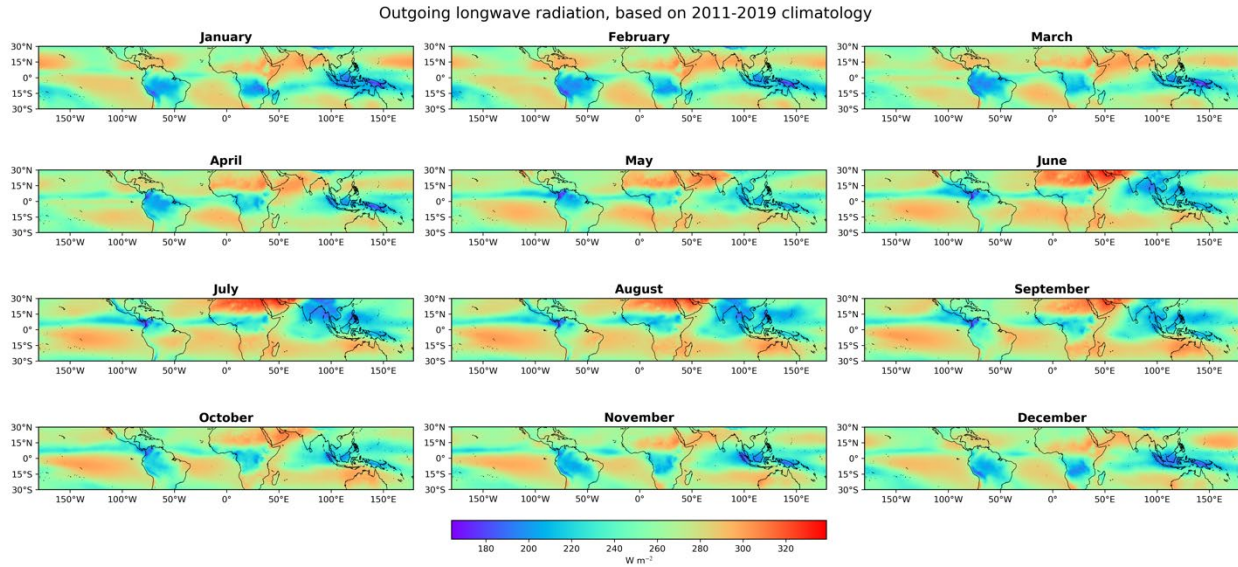

Figure SM4. Spatial distribution of the outgoing longwave radiation OLR, determined from ERA5 reanalysis (2011-2019).

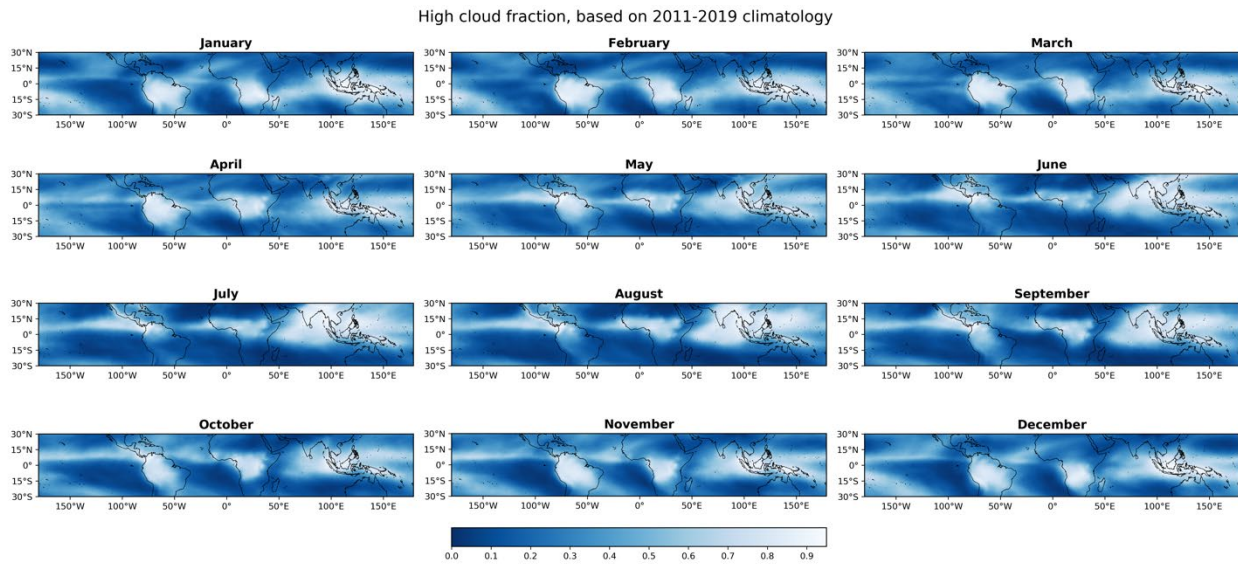

Figure SM5. Spatial distribution of the high cloud fraction determined from ERA5 reanalysis (2011-2019)

*Table SM1: Names and locations of the Megacities shown in Figures 1 and 7*

| <i>Name</i>    | <i>Latitude</i> | <i>Longitude</i> |
|----------------|-----------------|------------------|
| Bagalore       | 11.4            | 12.9716          |
| Bangkok        | 10.2            | 13.7563          |
| Beijing        | 19.6            | 39.9042          |
| Cairo          | 20.1            | 30.0444          |
| Chennai        | 10.5            | 13.0827          |
| Chongqing      | 14.8            | 29.4316          |
| Delhi          | 28.5            | 28.7041          |
| Dhaka          | 19.6            | 23.8103          |
| Guangzhou      | 12.6            | 23.1291          |
| Jakarta        | 10.5            | -6.2088          |
| Karachi        | 15.4            | 24.8607          |
| Kinshasa       | -13.2           | 4.4419           |
| Kolkata        | 14.7            | 22.5726          |
| Lagos          | 13.5n           | 6.5244           |
| Lahore         | 11.7            | 31.5204          |
| Manila         | 13.5            | 14.5995          |
| Mumbai         | 20              | 19.076           |
| Osaka          | 19.3            | 34.6937          |
| Rio de Janeiro | 13.3            | -22.9068         |
| Sao Paulo      | 21.7            | -23.5505         |
| Shanghai       | 25.6            | 31.2304          |
| Shenzhen       | 11.9            | 22.5431          |
| Tianjin        | 13.2            | 39.3434          |
| Tokyo          | 37.5            | 35.6762          |
